# Supplementary material for: Direct evidence that the VEGF-specific antibody bevacizumab has antivascular effects in human rectal cancer
Source: Springer Nature journal article supplement (doi:10.1038/nm988), 2004-01-25
Supplement: 41591_2004_BFnm988_MOESM1_ESM.pdf [file 41591_2004_BFnm988_MOESM1_ESM.pdf]

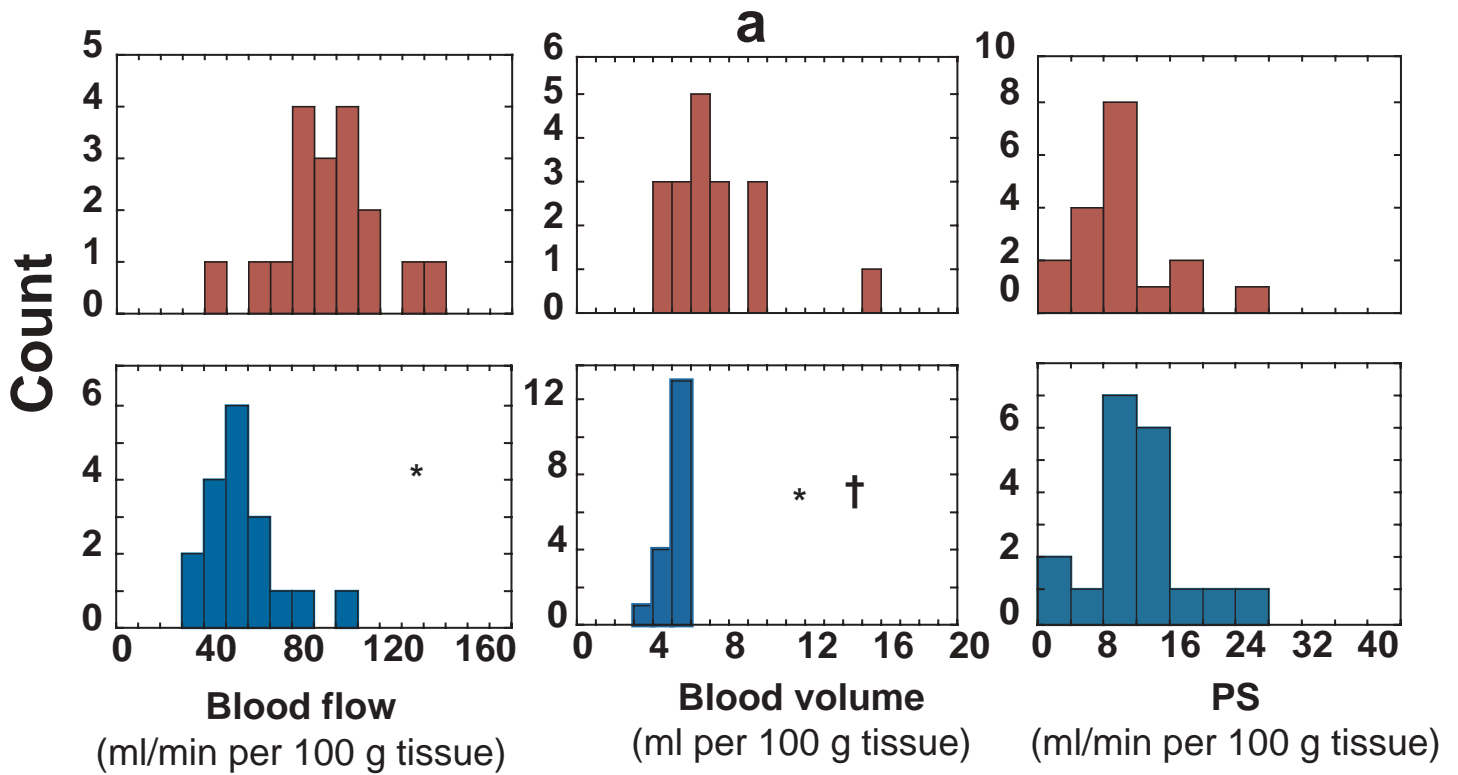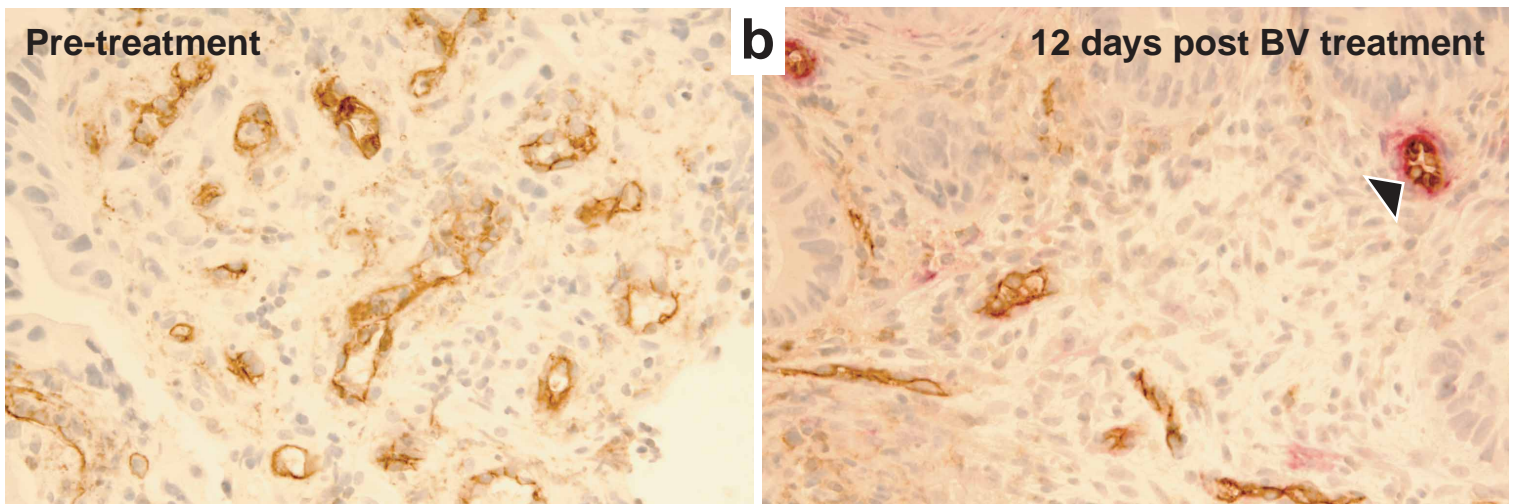

Supplementary Figure 1. (a) Distributions of blood flow, blood volume and PS product for patient one at day 0 (red) and day 12 (blue). (b) Representative fields depicting the variation in pericyte coverage between before and 12 days after bevacizumab treatment in patient six. The tissues were double stained for PECAM (DAB, brown) and  $\alpha$ -SMA (Fast Red, pink) and analysis was performed on an Olympus microscope BX40 using a 40X objective. Image width is 356 microns. Arrow-head: perivascular cells.
