# Supplementary material for: Direct evidence that the VEGF-specific antibody bevacizumab has antivascular effects in human rectal cancer
Source: Springer Nature journal article supplement (doi:10.1038/nm988), 2004-01-25
Supplement: 41591_2004_BFnm988_MOESM2_ESM.pdf [file 41591_2004_BFnm988_MOESM2_ESM.pdf]

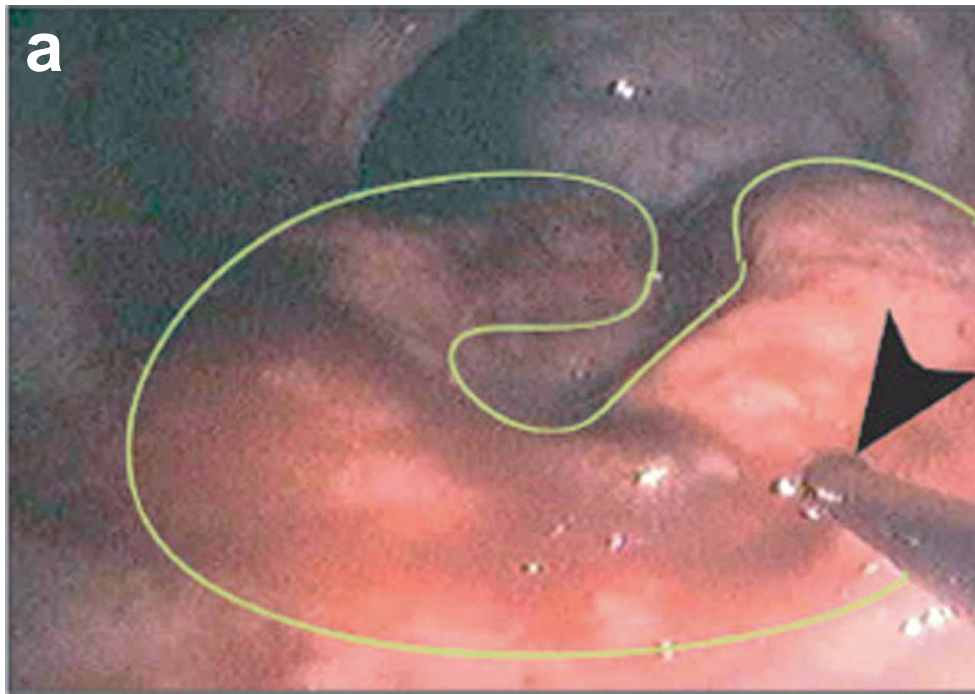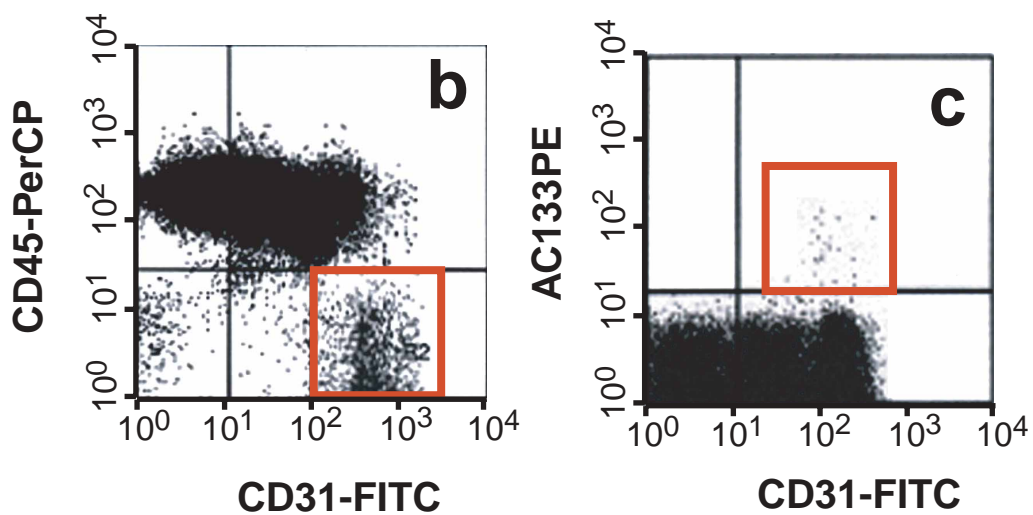

Supplementary Figure 2. (a) Endoscopic technique used for IFP measurement in rectal cancer: Arrowhead shows the pressure-sensing needle used to measure the IFP in the tumor. Green trace is delineating the tumor. Flow cytometry analyses on the kinetics of circulating cells in peripheral blood after bevacizumab administration. (b) CEC (CD31<sup>bright</sup>CD45<sup>-</sup>); electronic backgating and use of a vital dye (TOPRO-3) indicated that CD31<sup>bright</sup>CD45<sup>-</sup> cells represented viable CECs. (c) Evaluation of the circulating progenitor/stem cell population using the AC133 marker.
