# Supplementary material for: Direct evidence that the VEGF-specific antibody bevacizumab has antivascular effects in human rectal cancer
Source: Springer Nature journal article supplement (doi:10.1038/nm988), 2004-01-25
Supplement: 41591_2004_BFnm988_MOESM4_ESM.pdf [file 41591_2004_BFnm988_MOESM4_ESM.pdf]

## Supplementary Table 1

Statistical analysis comparing group values before and after one bevacizumab infusion

| Parameter                   | Before treatment        | After treatment         | P-value           |
|-----------------------------|-------------------------|-------------------------|-------------------|
| Blood flow                  | 81 ±16                  | 53 ± 9                  | 0.005             |
| Blood volume                | 6.8 ± 2.1               | 5.0 ± 0.94              | 0.03              |
| PS product                  | 14 ± 2                  | 12.9 ± 3.1              | 0.2               |
| Microvascular density       | 13.0 ± 3.2              | 6.9 ± 1.8               | 0.003             |
| α-SMA coverage              | 9.9 ± 3.8               | 17.8 ± 1.5              | 0.09 <sup>a</sup> |
| FDG uptake                  | 5.6 (1.9 – 12.9)        | 4.1 (2.9 – 13.8)        | 0.8 <sup>c</sup>  |
| Interstitial fluid pressure | 15.0 ± 2.0              | 4.0 ± 2.2               | 0.01              |
| CECs / WBC                  | 0.19 (0.006 - 0.029)    | 0.009 (0.004 - 0.019)   | 0.04 <sup>b</sup> |
| Progenitor/stem cells / WBC | 0.0011 (0.0006 - 0.206) | 0.0010 (0.0005 - 0.075) | 0.04 <sup>b</sup> |

<sup>a</sup>The difference in the fraction of α-SMA positive vessels in patient two was identified as an outlier by the Extreme Studentized Deviate (ESD) test. Paired t-test analyses of the mean values that excluded the data of patient two (6.4±1.9 and 17.8±1.9 for before and after treatment, respectively) had a  $P < 0.001$ .

<sup>b</sup>Wilcoxon signed-rank test.

<sup>c</sup>Note that at presurgery, the uptake was decreased significantly ( $P < 0.01$ ), compared to both these two timepoints.
